# Supplementary material for: Preparation of ellagic acid micro and nano formulations with amazingly increased water solubility by its entrapment in pectin or non-PAMAM dendrimers suitable for clinical applications
Source: Royal Society of Chemistry journal article supplement (doi:10.1039/c8nj05657a), 2019-01-01
Supplement: c8nj05657a1.pdf [file c8nj05657a1.pdf]

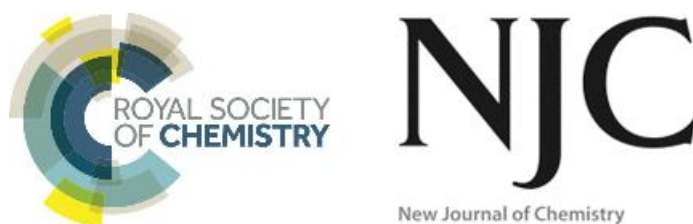

## Electronic Supporting Information

### **Ellagic Acid micro and nano formulations with amazingly increased water solubility by its entrapment in pectin or non-PAMAM dendrimers eligible for clinical applications**

Silvana Alfei,\* Federica Turrini, Silvia Catena, Paola Zunin, Brunella Parodi, Guendalina Zuccari, Anna Maria Pittaluga and Raffaella Boggia

*Department of Pharmacy, University of Genoa. Viale Cembrano, 4 I-16148 GENOA, ITALY*

Correspondence Author: Prof. Silvana Alfei  
Department of Pharmacy, University of Genoa  
Phone number: +39-010-3532296  
Fax number: +39-010-3532684  
Email: [alfei@difar.unige.it](mailto:alfei@difar.unige.it)  
ORCID: 0000-0002-4630-4371

## **Table of Contents.**

### **Section S1** FTIR, <sup>1</sup>H NMR and <sup>13</sup>C NMR of Ellagic Acid **1** and FTIR of LM pectin.

**Fig. S1** FTIR spectrum of **1**.

**Fig. S2** <sup>1</sup>H NMR spectrum of **1**.

**Fig. S3** <sup>13</sup>C NMR spectrum of **1**.

**Fig. S4** FTIR spectrum of LM pectin.

### **Section S2** Data about dendrimers **2** and **3**

**AD S1** Characterization data of dendrimers **2** and **3**.<sup>[1,2]</sup>

**Table S1** Cytotoxicity essay results.

**Fig. S5** Comparison between cytotoxicity data of dendrimers **2** and **3** and *b*-PEI taken as reference

### **Section S3** FTIR and <sup>1</sup>H NMR spectra of microsphere.

**Fig. S6** FTIR spectrum of microspheres with in evidence the signals derived from **1** compared to FTIR of EA and LM pectin.

**Fig. S7** <sup>1</sup>H NMR spectrum of soluble fraction of microsphere.

### **Section S4** Physicochemical and spectroscopic data and FTIR spectra of DPXs **4** and **5** with in evidence the signals derived from **1** compared to FTIR of EA and parent dendrimers **2** and **3**.

**AD S2** Physicochemical and spectroscopic data of DPXs **4** and **5**

**Fig. S8** Compound **4**.

**Fig. S9** Compound **5**.

### **Section S5** Further characterizations of formulations.

**Fig. S10** Image from Optical Microscopy Analysis.

**Fig. S11** Dynamic Light Scattering Analysis of **4**.

**Fig. S12** Dynamic Light Scattering Analysis of **5**.

**Fig. S13** Solubility of prepared DPXs in biocompatible solvents (water and ethanol) compared to solubility of free EA **1**.

**Fig. S14** Potentiometric titration curves of prepared DPXs and of three G4-PAMAM derivatives.

**Fig. S15** Buffer Capacity of prepared DPXs, parent dendrimers **2**, **3** and of three G4-PAMAMs taken as reference.

**Fig. S16** Histogram of average buffer capacity of prepared DPXs and of three G4-PAMAM derivatives (pH = 4.5-7.5).

**Fig. S17** RSA (%) curves recorded at different EA, EAMS and DPXs concentrations in methanol or water solution with the corresponding exponential tendency curves and related equations used to derive the IC<sub>50</sub> and IC<sub>90</sub> values.

**Table S2** Comparison between some properties of achieved EA-loaded formulations and literature data about already reported EA formulations.

**Section S1** FTIR,  $^1\text{H}$  NMR and  $^{13}\text{C}$  NMR of Ellagic Acid **1** and FTIR of pectin.

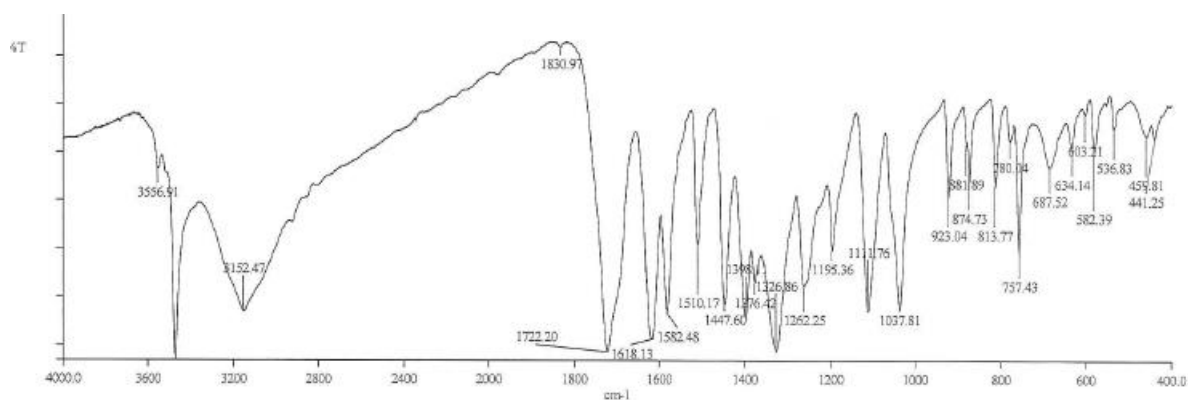

**Figure S1.** FTIR (KBr) of Ellagic Acid (**1**)

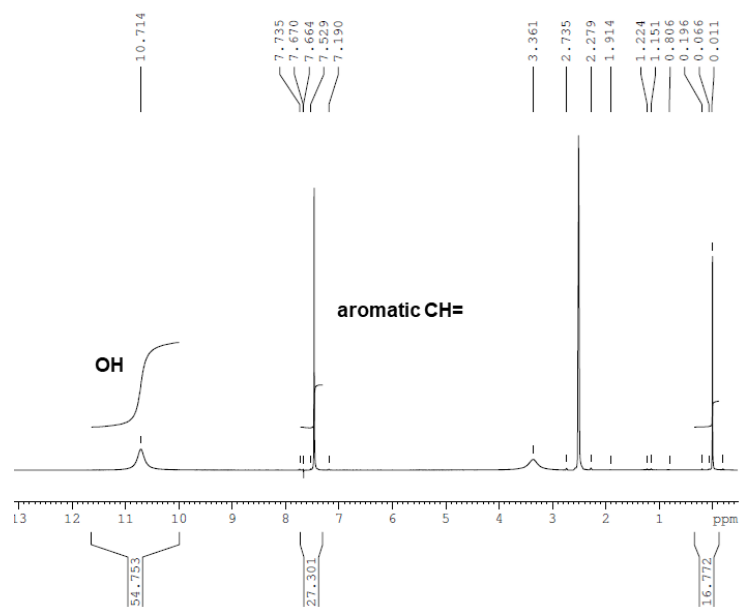

**Figure S2.**  $^1\text{H}$  NMR ( $\text{DMSO}-d_6$ , 300 MHz) of EA (**1**)

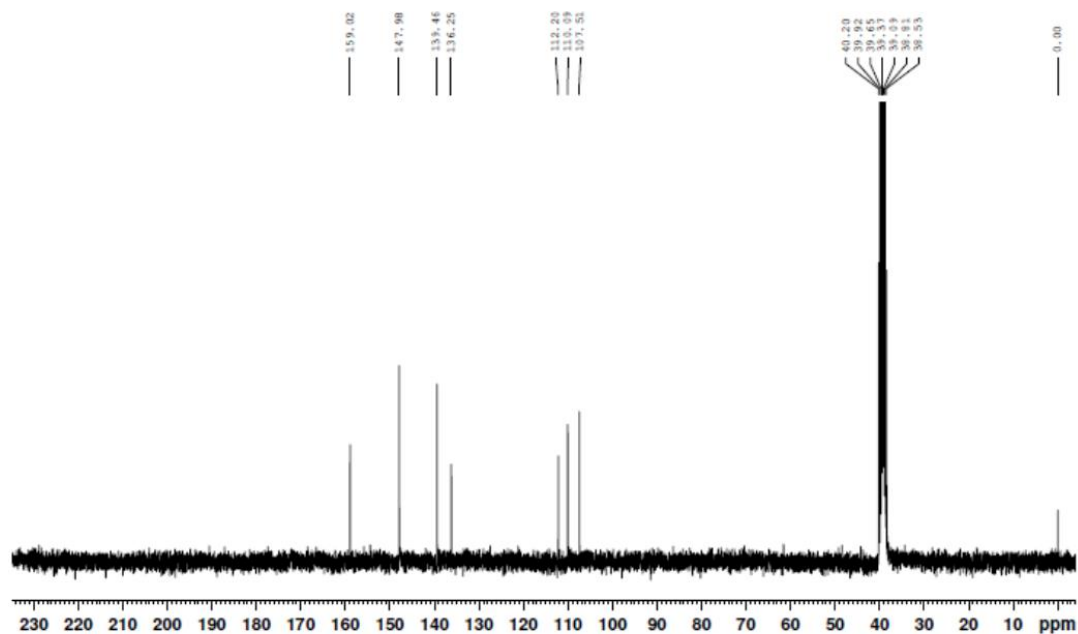

**Figure S3.**  $^{13}\text{C}$  NMR ( $\text{DMSO-}d_6$ , 75.5 MHz) of EA (1)

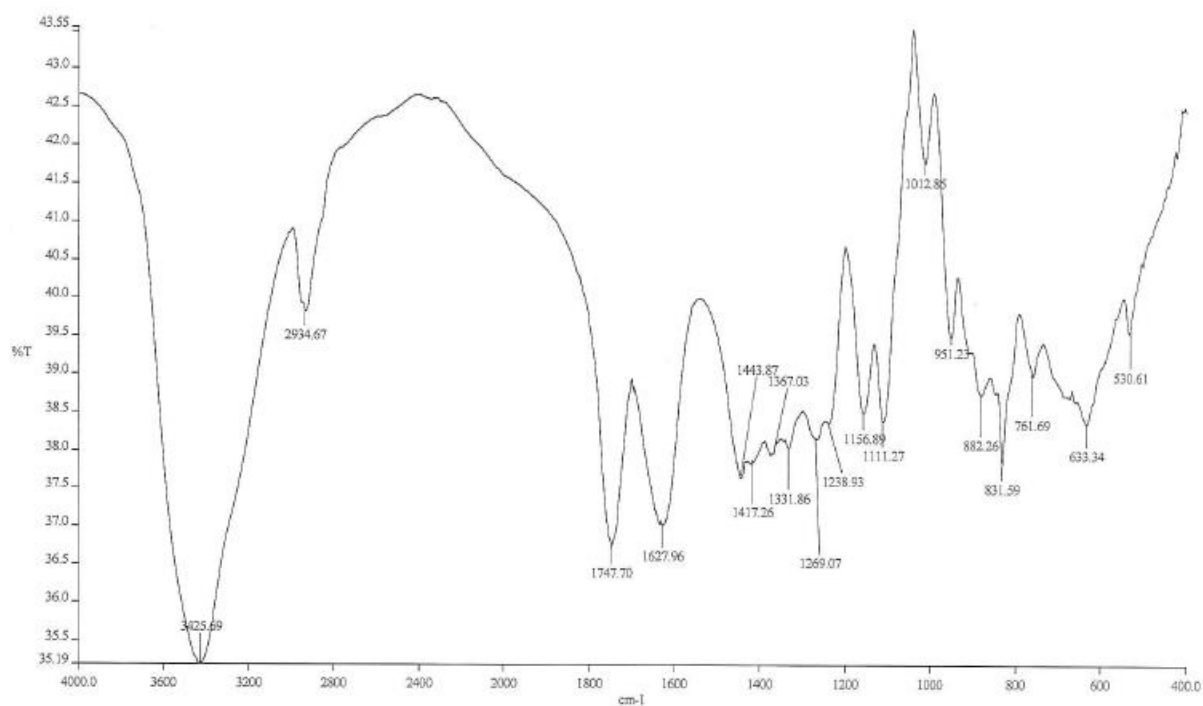

**Figure S4.** FTIR of LM pectin

## Section S2 Data about dendrimers 2 and 3

### AD S1 Characterization data of dendrimers 2 and 3.<sup>[1,2]</sup>

**Dendrimer 2 (79 HCl).**<sup>[1]</sup> Slightly Hygroscopic, off white spongy solid (250.7 mg, 0.01798 mmol, 92.1 % overall yield).

<sup>1</sup>H NMR (300 MHz, DMSO-*d*<sub>6</sub>, 25° C, TMS):  $\delta$  = 1.00-2.00 [more broad signals, 298H, (138H, CH<sub>3</sub> G4 + 96H, CH<sub>2</sub>CH<sub>2</sub>CH<sub>2</sub> Lys + 64H, CH<sub>2</sub>CH<sub>2</sub> Arg)], 2.76 (m, 32H, CH<sub>2</sub><sup>ε</sup>NH<sub>3</sub><sup>+</sup> Lys), 3.10-3.30 (m, 32H, CH<sub>2</sub><sup>δ</sup>NH Arg), 3.47 (br s, 24H, CH<sub>3</sub>NH<sub>2</sub><sup>+</sup> sarcosine), 3.50 (br s, 2H, CH<sub>2</sub>OH), 3.76 (s, 42H, (CH<sub>3</sub>)<sub>2</sub>NH<sup>+</sup> DMG), 4.01 (m, 32H, CHNH<sub>3</sub><sup>+</sup> Arg + Lys), 4.10-4.50 [m, 215H (14H, CH<sub>2</sub>NH<sup>+</sup> DMG + 16H, CH<sub>2</sub>NN<sub>2</sub><sup>+</sup> sarcosine + 184H, CH<sub>2</sub>O G4 + 1H, OH)], 8.08, 8.23, 8.81 [three broad signals, 247H (48H, NH<sub>3</sub><sup>+</sup>Arg + 32H, <sup>ω</sup>NH<sub>2</sub><sup>+</sup> Arg + 32H, <sup>ω</sup>NH<sub>2</sub> Arg + 16H <sup>δ</sup>NHArg + 48H, <sup>α</sup>NH<sub>3</sub><sup>+</sup> Lys + 48H <sup>ε</sup>NH<sub>3</sub><sup>+</sup> Lys + 7H, NH<sup>+</sup> DMG + 16H, NH<sub>2</sub><sup>+</sup> sarcosine)]. FTIR (KBr, cm<sup>-1</sup>): 3431 (NH<sub>3</sub><sup>+</sup> + OH), 2934, 1741 (C=O esters), 1630 (NH); elemental analysis calcd (%) for C<sub>474</sub>H<sub>924</sub>N<sub>111</sub>Cl<sub>79</sub>O<sub>185</sub>: C, 40.84; H, 6.68; Cl, 20.09; N, 11.15%. Found: C, 41.20; H 6.86; Cl, 20.08; N, 10.96.

**Dendrimer 3 (37HCl).**<sup>[2]</sup> Hygroscopic, pale yellow glassy solid (372.6 mg, 0.054 mmol, 88.8%, overall yield: 70.1%).

<sup>1</sup>H NMR (300 MHz, DMSO-*d*<sub>6</sub>, 25° C, TMS):  $\delta$  = 0.85 (t, 3H, *J* = 7.0 Hz, CH<sub>3</sub> stearate), 1.00, 1.03, 1.08 and 1.10 (four signals, 63H, CH<sub>3</sub> D1, D2, D3), 1.26 (s, 28H, CH<sub>2</sub> stearate), 1.00-2.00 [m, 72H ( 28H, CH<sub>2</sub>CH<sub>2</sub> Arg + 42H, CH<sub>2</sub>CH<sub>2</sub>CH<sub>2</sub> Lys + 2H, one CH<sub>2</sub> stearate)], 2.30 (s, 2H, CH<sub>2</sub>C=O stearate), 2.76 (m, 14H, CH<sub>2</sub><sup>ε</sup>NH<sub>3</sub><sup>+</sup> Lys), 3.10-3.30 (very broad signal, 14H, CH<sub>2</sub><sup>δ</sup>NH Arg), 3.52 (br s, 2H, CH<sub>2</sub>OH), 3.75 [s, 42H, (30H, CH<sub>3</sub>NH<sup>+</sup>CH<sub>3</sub> DMG + 12 H, CH<sub>3</sub>NN<sub>2</sub><sup>+</sup> sarcosine)], 4.00 (m, 14H, CHNH<sub>3</sub><sup>+</sup> Arg + Lys), 4.10-4.50 [m, 108H (10H, CH<sub>2</sub>NH<sup>+</sup> DMG + 8H, CH<sub>2</sub>NN<sub>2</sub><sup>+</sup> sarcosine + 90H, CH<sub>2</sub>O D1, D2, D3 + CH<sub>2</sub>O core)], 8.08, 8.21, 8.76 [three broad signals, 111H (21H, NH<sub>3</sub><sup>+</sup>Arg + 14H, <sup>ω</sup>NH<sub>2</sub><sup>+</sup> Arg + 14H, <sup>ω</sup>NH<sub>2</sub> Arg + 7H <sup>δ</sup>NHArg + 21H, <sup>α</sup>NH<sub>3</sub><sup>+</sup> Lys + 21H <sup>ε</sup>NH<sub>3</sub><sup>+</sup> Lys + 5H, NH<sup>+</sup> DMG + 8H, NH<sub>2</sub><sup>+</sup> sarcosine)], 1H, OH, not detected. FTIR (KBr, cm<sup>-1</sup>): 3600-2400 (NH<sub>3</sub><sup>+</sup> + OH), 1742 (C=O esters), 1626 (NH).

## References

- [1] S. Alfei, S. Catena. Synthesis and characterization of fourth generation polyester-based dendrimers with cationic amino acids-modified crown as promising water soluble biomedical devices. Polym. Adv. Technol. **2018**, 29, 2735-2749.
- [2] S. Alfei, S. Catena. Synthesis and characterization of versatile amphiphilic dendrimers peripherally decorated with positive charged amino acids, Polym. Int. **2018**, 67, 1572-1584.

**Table S1**  
Cell viability values for dendrimers 2 and 3

| Cpd | μg/mL | Cell viability (%) |           |
|-----|-------|--------------------|-----------|
|     |       | B14                | BRL       |
| 2   | 20.7  | 69.9±3.1           | 84.2±1.7  |
| 3   | 11.2  | 109.2±8.4          | 105.8±3.3 |

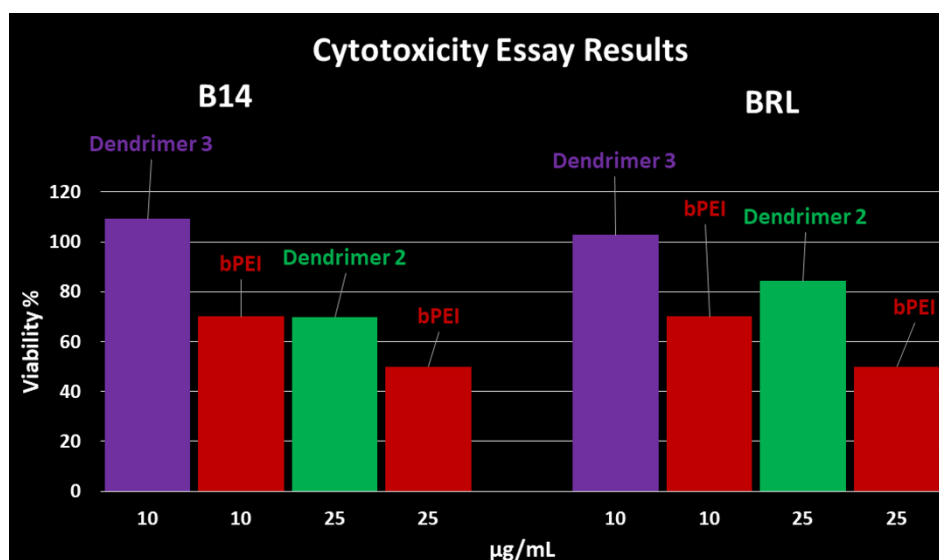

**Figure S5.** Comparison between cytotoxicity data of dendrimers 2 and 3 and *b*-PEI taken as reference

### Section S3 FTIR and <sup>1</sup>H NMR spectra of microspheres (EAMsS).

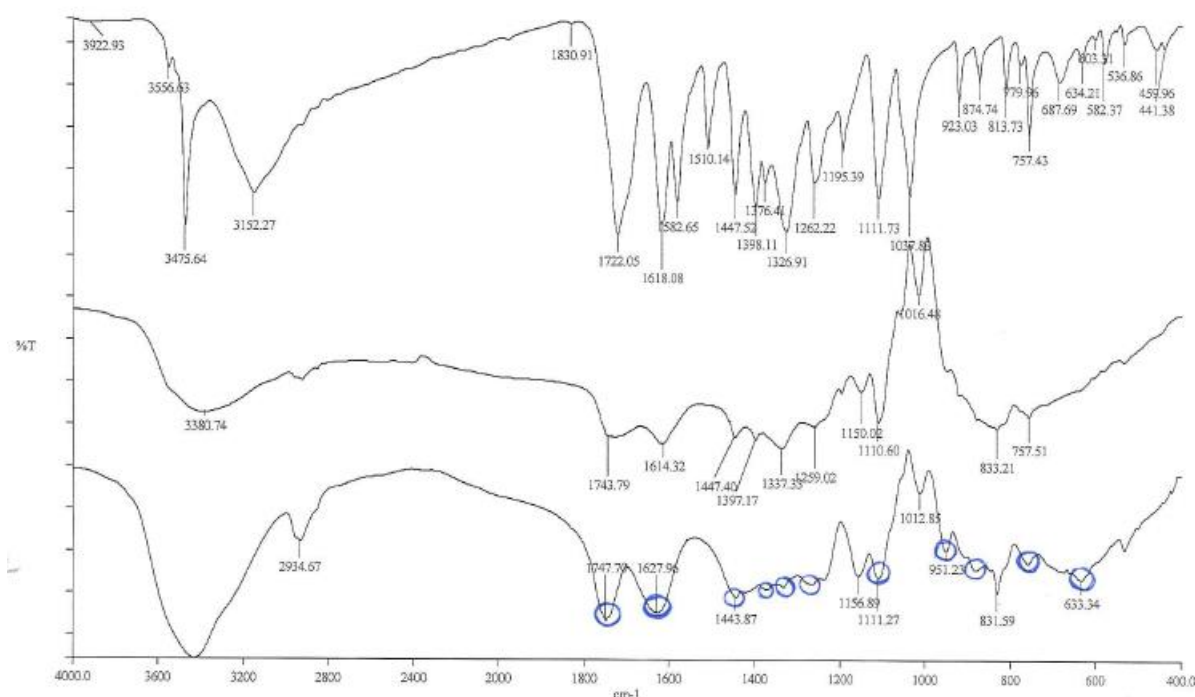

**Figure S6.** FTIR spectrum of EAMsS (bottom panel) with in evidence the signals derived from **1** compared to FTIR of EA (top panel) and LM pectin (middle panel). FTIR spectrum of EAMsS was very similar to pectin one but more articulated in the area between 1050 and 1500  $\text{cm}^{-1}$  and below 1000  $\text{cm}^{-1}$ . Then the bands around 1700 and 1600  $\text{cm}^{-1}$  appeared much more intense thanks to the contribution of EA in the microspheres.

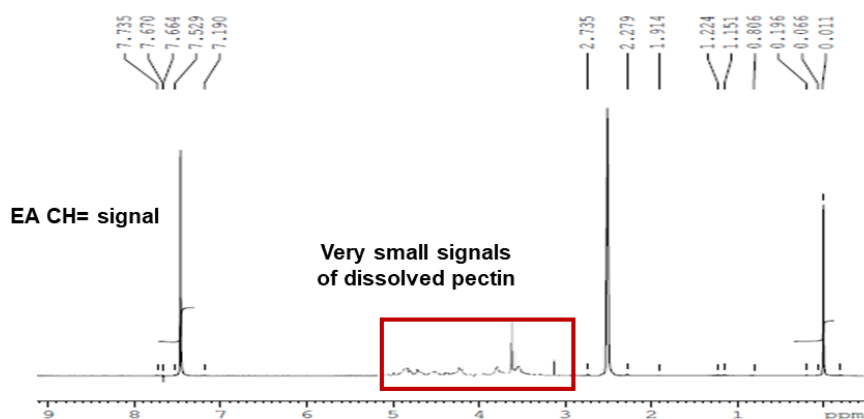

**Figure S7.**  $^1\text{H}$  NMR spectrum of EAMSS (soluble fraction): the peak at 7.53 ppm relative to the only non-exchangeable aromatic protons of EA, further confirmed that it had been successfully loaded into pectin matrix

**Section S4** Physicochemical and spectroscopic data and FTIR spectra of DPXs **4** and **5** with in evidence the signals derived from **1** compared to FTIR of EA and parent dendrimers **2** and **3**.

#### AD S2.

For a better understanding of the name attributed to each DPX, it should be noted that the amino acid composition has been indicated using the common three letter acronyms whenever possible (Arg = arginine, Lys = Lysine). DMG stands for dimethylglycine, MG for methylglycine, OH stands for eventually present hydroxyl group and **1** for EA. The numbers in parentheses indicate the number of units of that residual.

#### DPX **4**: [Arg(16)Lys(16)DMG(7)MG(8)OH(1)**1**(39)]

Slightly hygroscopic orange amorphous solid [38.6 equiv. of **1** per dendrimer mole (73.3 mg, 0.00286 mmol, yield: 99.9%).  $^1\text{H}$  NMR (300 MHz,  $\text{DMSO}-d_6$ , 25° C, TMS):  $\delta$  = 1.00-2.00 [more broad signals, 298H, (138H,  $\text{CH}_3$  G4 + 96H,  $\text{CH}_2\text{CH}_2\text{CH}_2$  Lys + 64H,  $\text{CH}_2\text{CH}_2$  Arg)], 2.76 (m, 32H,  $\text{CH}_2^e\text{NH}_3^+$  Lys), 3.19 (br m, 32H,  $\text{CH}_2^d\text{NH}$  Arg), 3.47 (s, 24H,  $\text{CH}_3\text{NH}_2^+$  sarcosine), 3.50 (m, 2H,  $\text{CH}_2\text{OH}$ ), 3.58 (s, 42H,  $(\text{CH}_3)_2\text{NH}^+$  DMG), 3.80-4.40 [very broad signals, 247H (32H,  $\text{CHNH}_3^+$  Arg + Lys + 14H,  $\text{CH}_2\text{NH}^+$  DMG + 16H,  $\text{CH}_2\text{NN}_2^+$  sarcosine + 184H,  $\text{CH}_2\text{O}$  G4 + 1H, OH)], 7.51, 7.54, 7.55, 7.60, 7.63 and 7.69 (more s signals, 78H,  $\text{CH=}$  aromatics of EA), 8.00-9.00 (very small signals of H atoms linked to N atoms of parent dendrimer **2**. FTIR (KBr): 3406 (OH and NH), 1736 ( $\text{C=O}$  ester), 1624 (NH and EA band), 1582, 1449, 1376, 1328, 1260, 1192, 1107, 1040, 755, 603, 574 (bands mainly derived from EA).

#### DPX **5**: [Arg(7)Lys(7)DMG(5)MG(4)OH(1)**1**(25)]

No hygroscopic yellowish amorphous solid [24.9 equiv. of **1** per dendrimer mole (87.6 mg, 0.0061 mmol, yield: 99.9%).  $^1\text{H}$  NMR (300 MHz,  $\text{DMSO}-d_6$ , 25° C, TMS):  $\delta$  = 0.85 (very small signals, m, 3H,  $\text{CH}_3$  stearate), 1.00-2.00

[more signals, 163H (63H, CH<sub>3</sub> D1, D2, D3 + 30H, CH<sub>2</sub> stearate + 28H, CH<sub>2</sub>CH<sub>2</sub> Arg + 42H, CH<sub>2</sub>CH<sub>2</sub>CH<sub>2</sub> Lys)], 2.30 (s, 2H, CH<sub>2</sub>C=O stearate), 2.70-3.00 (m, 14H, CH<sub>2</sub> $\epsilon$ NH<sub>3</sub><sup>+</sup> Lys), 3.19 (12 H, CH<sub>3</sub>NN<sub>2</sub><sup>+</sup> sarcosine), 3.30 (m, 14H, CH<sub>2</sub> $\delta$ NH Arg), 3.48 [two overlapped signals, 32H (2H, CH<sub>2</sub>OH + 30H, CH<sub>3</sub>NH<sup>+</sup>CH<sub>3</sub> DMG)], 3.90-5.00 [very broad signal, H (14H, CHNH<sub>3</sub><sup>+</sup> Arg and Lys + 10H, CH<sub>2</sub>NH<sup>+</sup> DMG + 8H, CH<sub>2</sub>NN<sub>2</sub><sup>+</sup> sarcosine + 90H, CH<sub>2</sub>O dendrimer scaffold)], 5.22 (s, 1H, OH), 7.48, 7.51, 7.54 (three s signals, 50H, CH= aromatics of EA), 8.00-9.00 (very small signals of H atoms linked to N atoms of parent dendrimer **3**), 10.71 (very small br s of OH of EA). FTIR (KBr): 3411, 3336 (OH and NH), 1734 (C=O ester), 1627 (NH and EA band), 1579, 1508, 1449, 1400, 1376, 1125, 1045, 917, 892, 815, 755, 641 (bands derived from EA).

**FTIR spectra of DPXs 4 and 5:** Together with bands belonging to dendrimers [2929 (**2**), 2851 and 2929 (**3**) cm<sup>-1</sup> (methyl and methylene groups) and 1736 (**2**), 1734 (**3**) cm<sup>-1</sup> (C=O esters)] several bands belonging to EA were detectable.

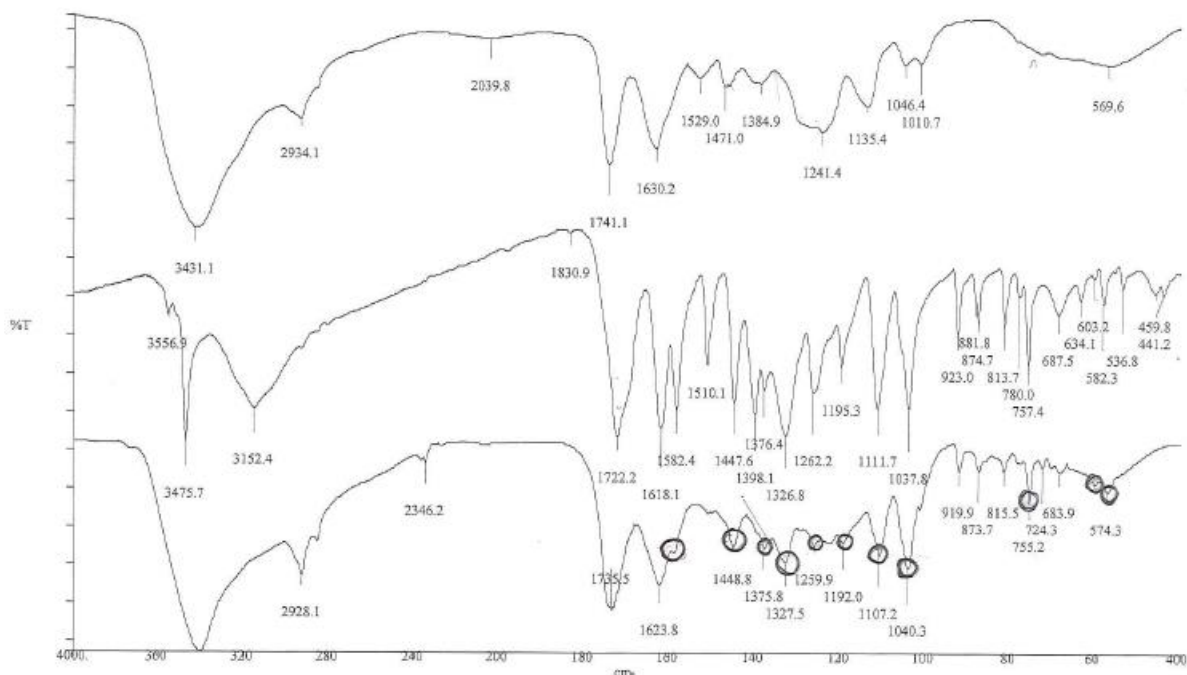

**Figure S8.** FTIR spectra of DPX **4** (bottom panel) with in evidence the signals derived from **1** compared to FTIR of EA (middle panel) and parent dendrimer **2** (top panel).

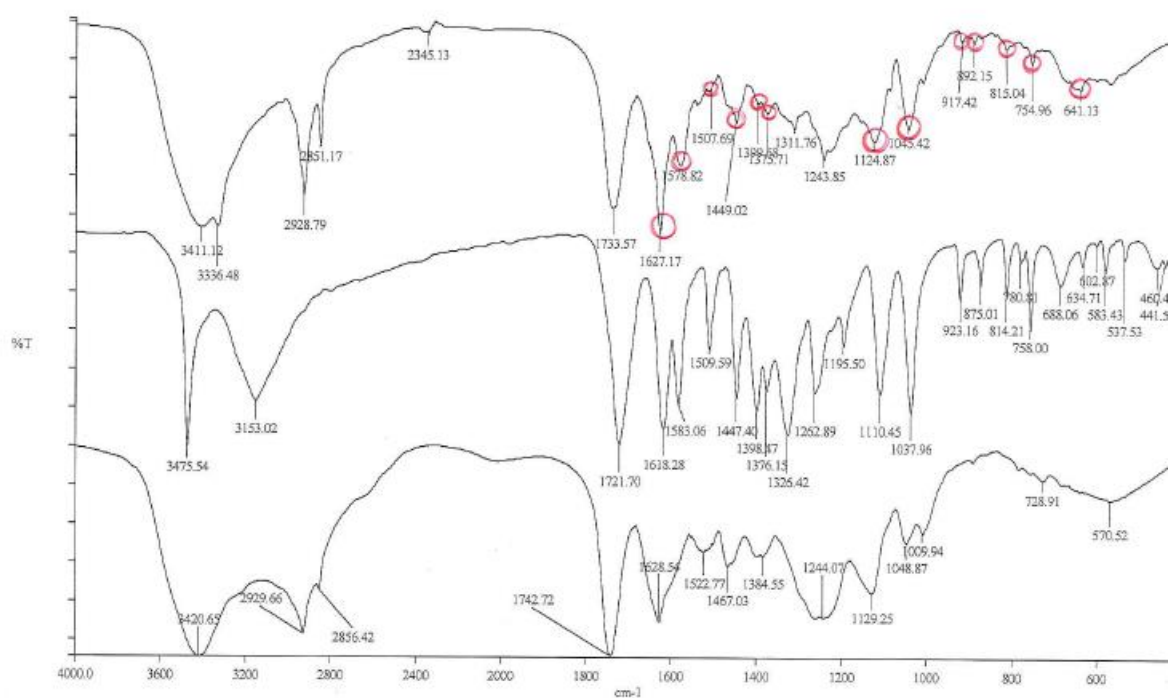

**Figure S9.** FTIR spectra of DPX 5 (top panel) with in evidence the signals derived from 1 compared to FTIR of EA (middle panel) and parent dendrimer 3 (bottom panel).

#### Section S5 Further characterizations of formulations.

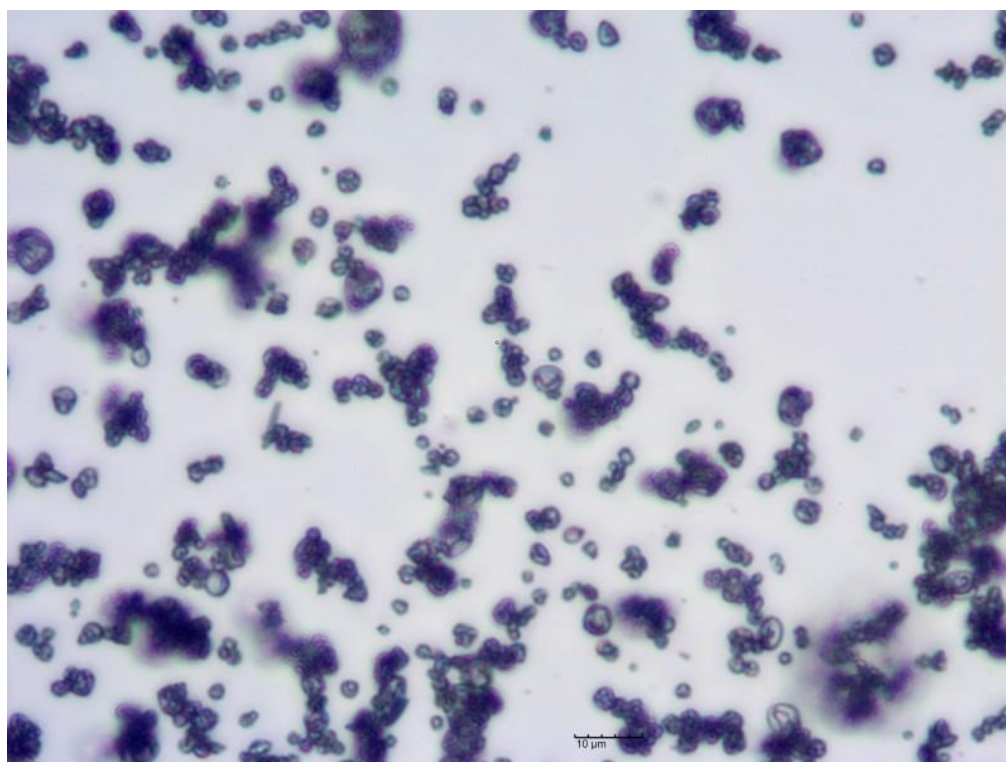

**Figure S10.** EAMs images from Optical Microscopy Analysis.

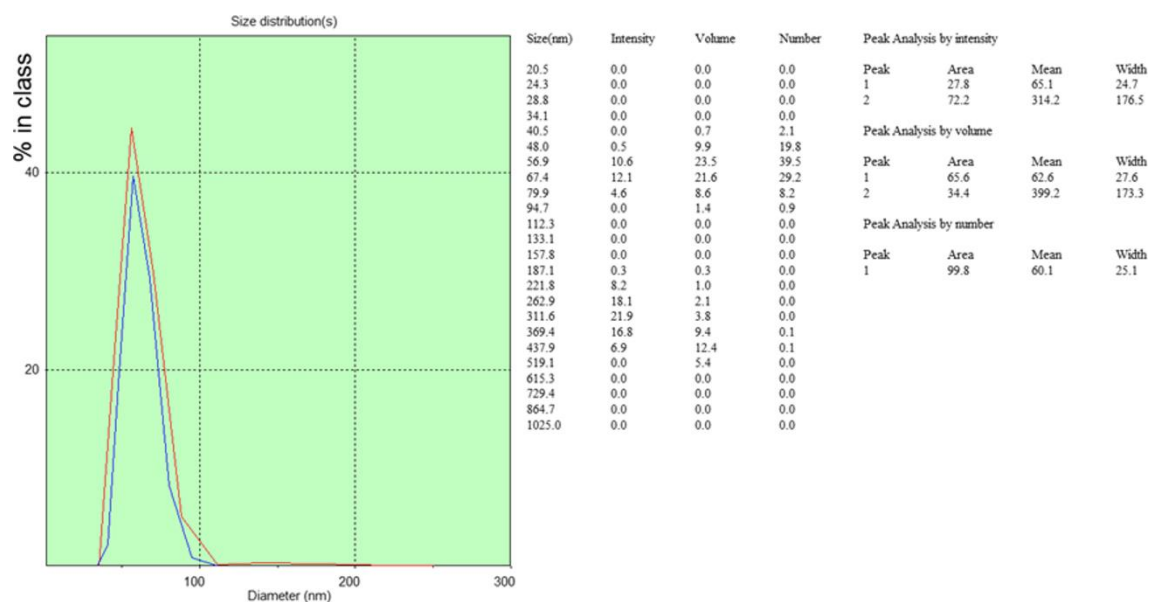

**Figure S11.** Dynamic Light Scattering Analysis of 4.

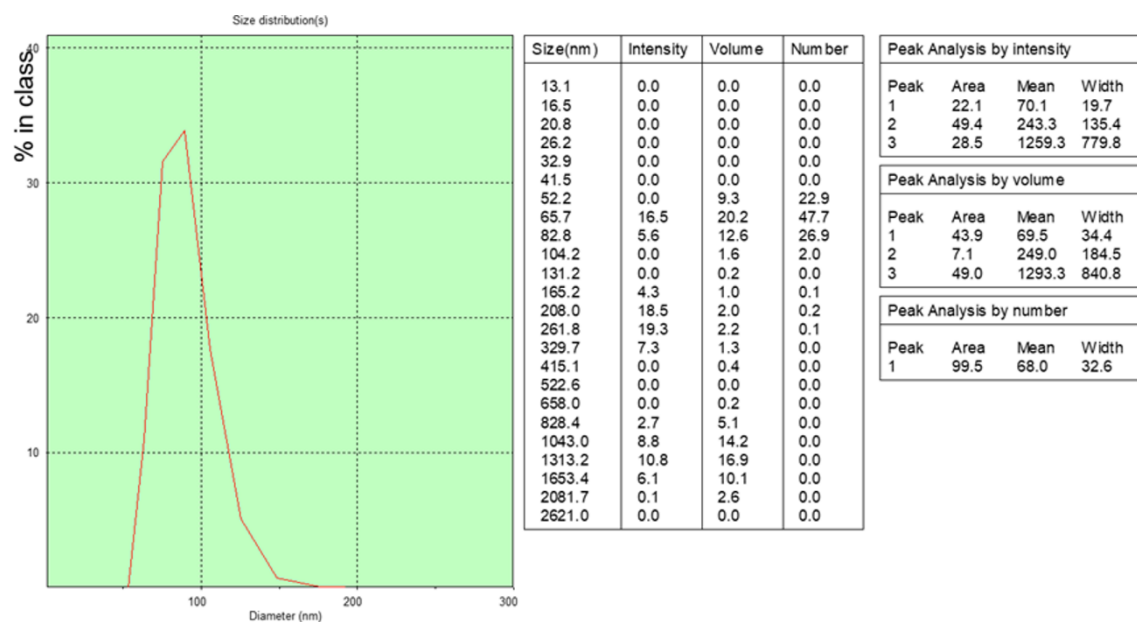

**Figure S12.** Dynamic Light Scattering Analysis of 5.

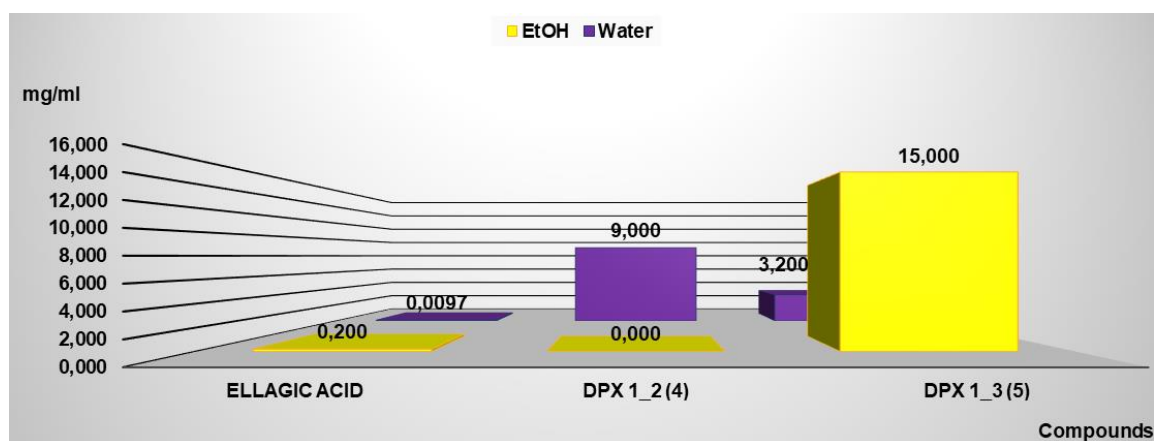

**Figure S13.** Solubility of DPXs 4 and 5 in biocompatible solvents (EtOH and water) compared to solubility of free EA 1.<sup>[1]</sup>

**Reference.**

[1] I. Bala, V. Bhardwaj, S. Hariharan, M. N. V. R. Kumar, *J. Pharm. Biomed. Anal.* **2006**, 40, 206–210.

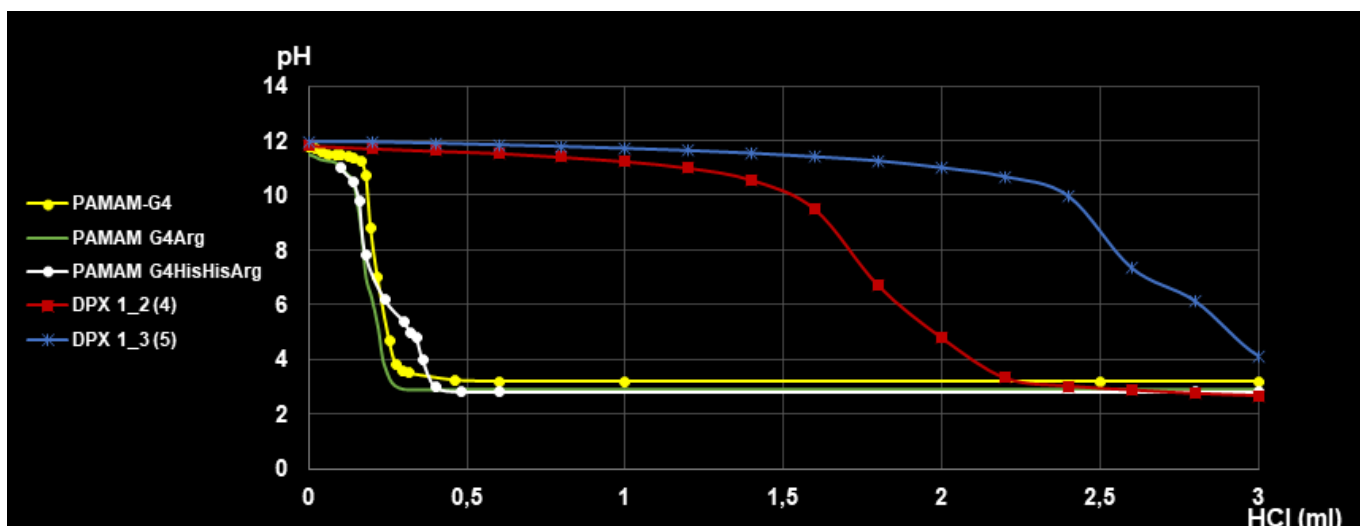

**Figure S14.** Potentiometric titration of DPXs 4 and 5 and of three G4-PAMAMs taken as reference

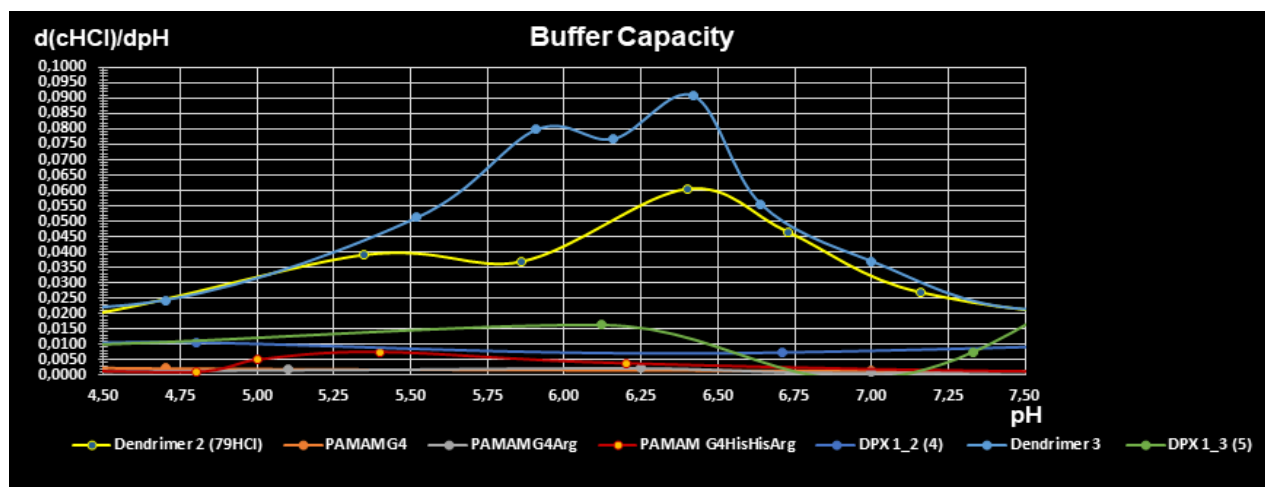

**Figure S15.** Buffer Capacity of DPXs 4 and 5, parent dendrimers 2 and 3 and of three G4-PAMAMs taken as reference

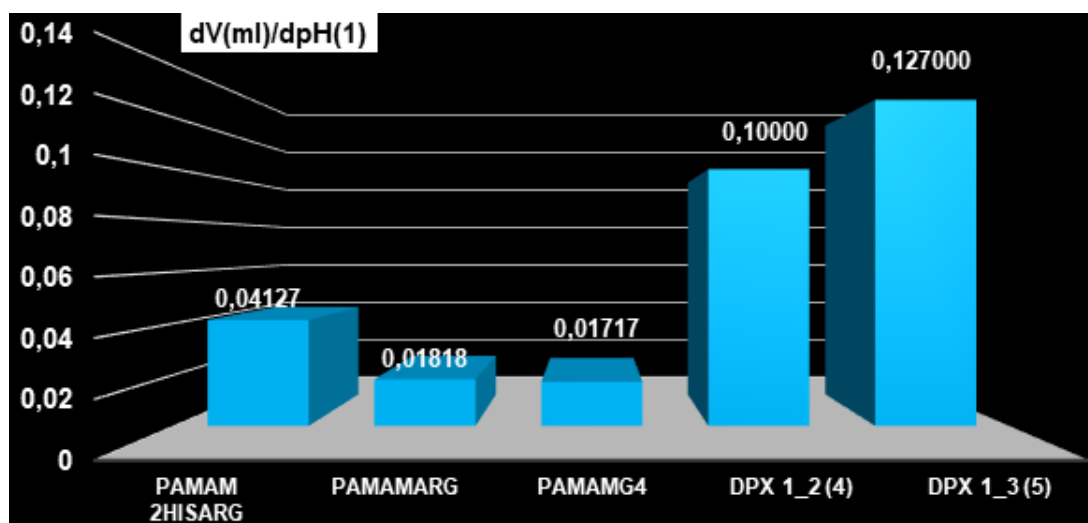

**Figure S16.** Average Buffer Capacity\* of DPXs 4 and 5 and of three G4-PAMAMs taken as reference (pH range = 4.5-7.5)

\*calculated for three degrees of freedom

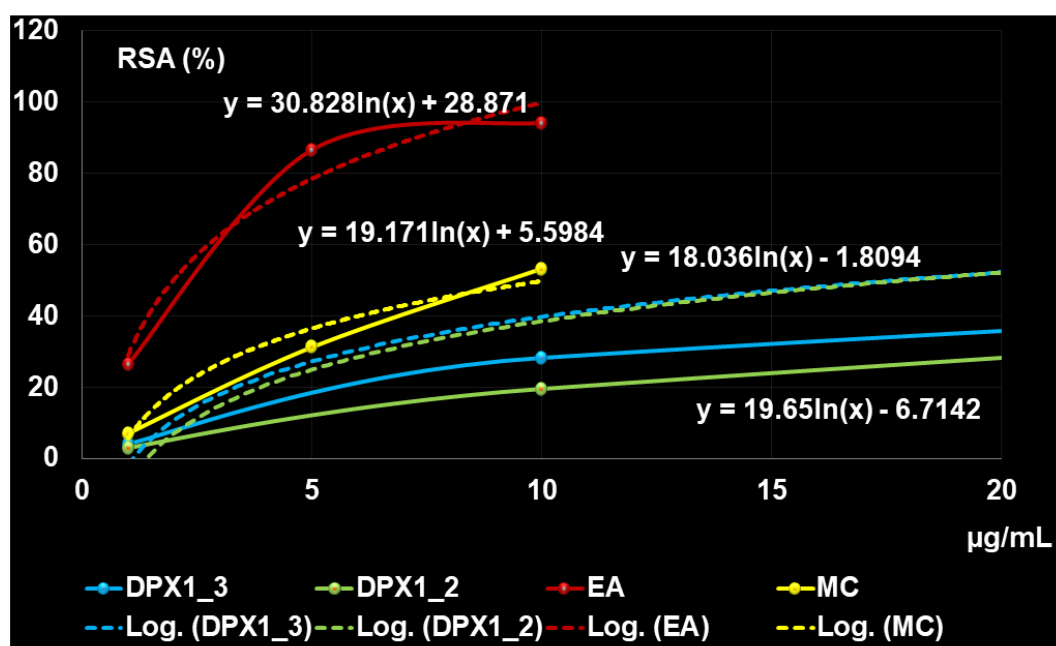

**Figure S17.** RSA (%) curves recorded at different EA, EAMS (MC) and DPXs concentrations in methanol or water solution with the corresponding exponential tendency curves and related equations used to derive the IC<sub>50</sub> and IC<sub>90</sub> values are available.

**Table S2**

Comparison between main properties of achieved EA-loaded formulations and available literature data about EA formulation previously achieved.

| EA Formulation             | DL <sup>‡</sup><br>(%w/w) | Solubility<br>mg/mL        | In vitro antioxidant activity (RSA%) |                          | Mean particle size        | Average Buffer<br>capacity |
|----------------------------|---------------------------|----------------------------|--------------------------------------|--------------------------|---------------------------|----------------------------|
|                            |                           |                            | IC <sub>50</sub> (µg/mL)             | IC <sub>90</sub> (µg/mL) |                           |                            |
| EAMs                       | 22                        | 0.3 (Water)                | 10                                   |                          | Max 20 µm <sup>¶</sup>    | Not evaluated              |
|                            |                           |                            | 81                                   |                          |                           |                            |
| DPX 4                      | 46                        | 9 (water)                  | 18                                   |                          | 62.6±2.0 nm <sup>a</sup>  | 0.100                      |
|                            |                           |                            | 134                                  |                          |                           |                            |
| DPX 5                      | 53                        | 3.2 (water)                | 18                                   |                          | 69.2±0.9 nm <sup>a</sup>  | 0.127                      |
|                            |                           | 15 (ethanol)               | 164                                  |                          |                           |                            |
| EA/PLGA <sup>[1]</sup>     | 52-62 <sup>§</sup>        | Not evaluated              | Not evaluated                        |                          | 125-293 nm <sup>§,a</sup> | Not evaluated              |
| EA/PCL <sup>[1]</sup>      | 47-57 <sup>§</sup>        | Not evaluated              | Not evaluated                        |                          | 128-281 nm <sup>§,a</sup> | Not evaluated              |
| EA/PLGA <sup>[2]</sup>     | 42-67 <sup>§</sup>        | Not evaluated              | Not evaluated                        |                          | 149-618 nm <sup>§,a</sup> | Not evaluated              |
| EA/PL <sup>†, [3]</sup>    | 96                        | 0.029 (water)              | Not evaluated                        |                          | Not evaluated             | Not evaluated              |
|                            |                           | 0.988 ( <i>n</i> -octanol) |                                      |                          |                           |                            |
| EA/liposome <sup>[4]</sup> |                           | Not evaluated              | Not evaluated                        |                          | 387 nm <sup>§</sup>       | Not evaluated              |
| EA/SLNs <sup>[5]</sup>     | 89                        | Not evaluated              | Not evaluated                        |                          | 96 nm <sup>§</sup>        | Not evaluated              |
| EA/β-CD <sup>b, [6]</sup>  |                           | 0.039 (water)              | Not evaluated                        |                          | 10-100 µm <sup>c</sup>    | Not evaluated              |

†PL=phospholipids; ‡DL = Drug Loading; §a range was given because values differ in function of stabilizer used for preparing the EA-loaded nanoparticles;

¶determined by Electronic Microscopy Analysis; <sup>a</sup>determined by dynamic light scattering using zetasizer Nano ZS (Malvern Instruments, UK); <sup>b</sup>Cyclodextrins; by SEM analysis.[1] K. Sonaje, J. L. Italia, G. Sharma, V. Bhardwaj, K. Tikoo, M. N. Kumar, *Pharm. Res.* **2007**, 24, 899-908.[2] I. Bala et al., *Nanotechnol.* **2005**, 16, 2819.[3] A. M. Avachat, V. G. Patel, *Saudi Pharm. J.* **2015**, 23, 276-289.

- [4] S. Madrigal-Carballoa, S. Limb, G. Rodriguez, A. O. Vilac, C. G. Kruegerb, S. Gunasekaranb, J. D. Reed, *J. Funct. Foods* **2010**, 2, 99-106.
- [5] H. Hajipour, H. Hamishehkar, M. Rahmati-yamchi, D. Shanehbandi, S. Nazari Soltan Ahmad, et al. *Int. J. Cancer Manag.* **2018**, 11, e9402.
- [6] V. D. Bulani et al. *J. Mol. Struct.* **2016**, 1105, 308-315.
